# Supplementary material for: Dispersive Solid–Liquid Extraction Coupled with LC-MS/MS for the Determination of Sulfonylurea Herbicides in Strawberries
Source: MDPI journal article supplement (doi:10.3390/foods8070273), 2019-07-22
Supplement: s1 [file s1]

## Supplementary Material

### Dispersive solid-liquid extraction coupled with LC-MS/MS for the determination of sulfonylurea herbicides in strawberries

Song *et al.*

---

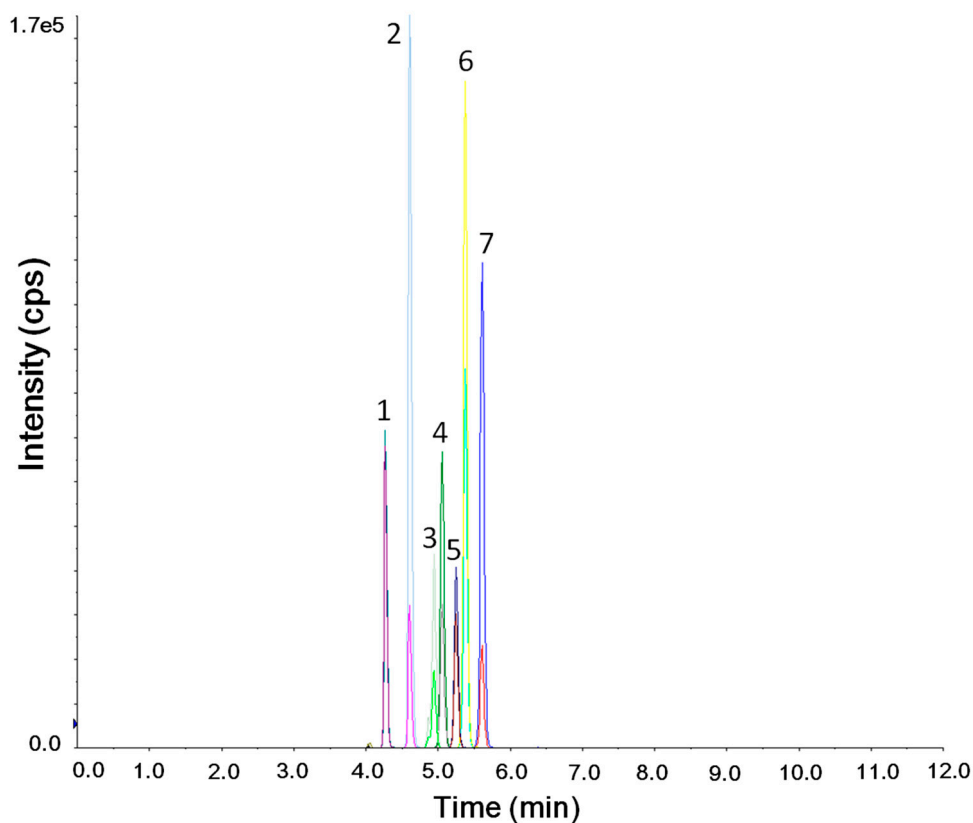

**Figure S1.** The multiple reaction monitoring chromatogram of 7 sulfonylurea herbicides at the optimized LC–MS/MS conditions. Peaks: 1, chlorsulfuron; 2, azimsulfuron; 3, flucetosulfuron; 4, metazosulfuron; 5, imazosulfuron; 6, ethoxysulfuron; 7, halosulfuron-methyl.
